# Supplementary material for: High internal ionic liquid phase emulsion stabilized by metal–organic frameworks
Source: Royal Society of Chemistry journal article supplement (doi:10.1039/c6sm01610c), 2016-01-01
Supplement: c6sm01610c1.pdf [file c6sm01610c1.pdf]

## High internal ionic liquid phase emulsion stabilized by metal-organic framework

Zhihao Li, Jianling Zhang,\* Tian Luo, Xiuniang Tan, Chengcheng Liu, Xinxin Sang,  
Xue Ma, Buxing Han, Guanying Yang

Beijing National Laboratory for Molecular Sciences, CAS Key Laboratory of Colloid  
and Interface and Thermodynamics, Institute of Chemistry, Chinese Academy of  
Sciences, Beijing 100190, China. University of Chinese Academy of Sciences,  
Beijing 100049, P. R. China.

\*e-mail: zhangjl@iccas.ac.cn

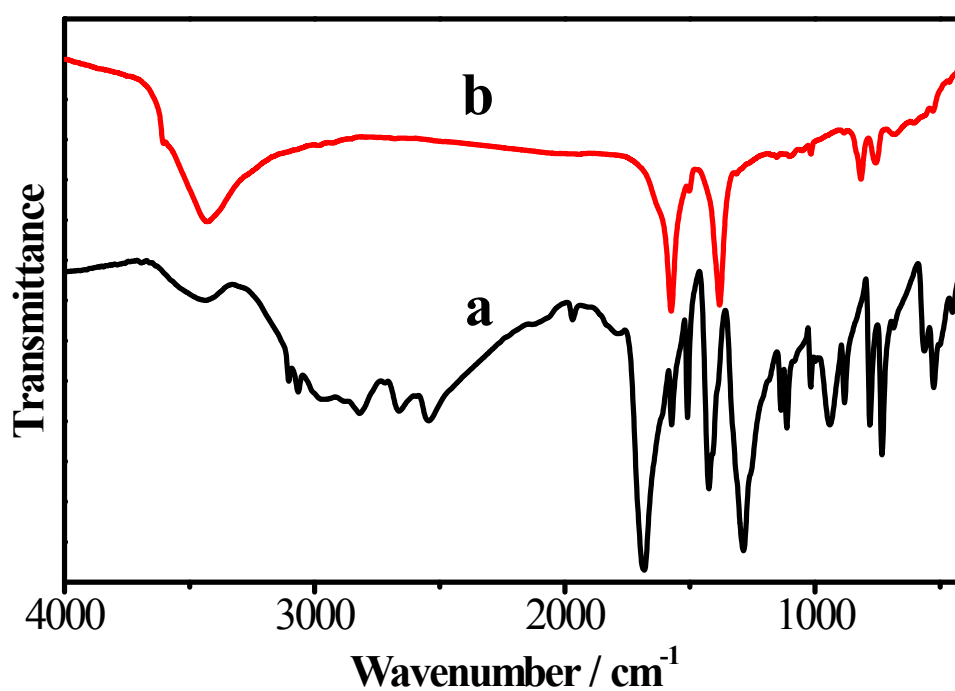

**Figure S1.** FT-IR spectra of H<sub>2</sub>BDC (a) and Ni-BDC (b).

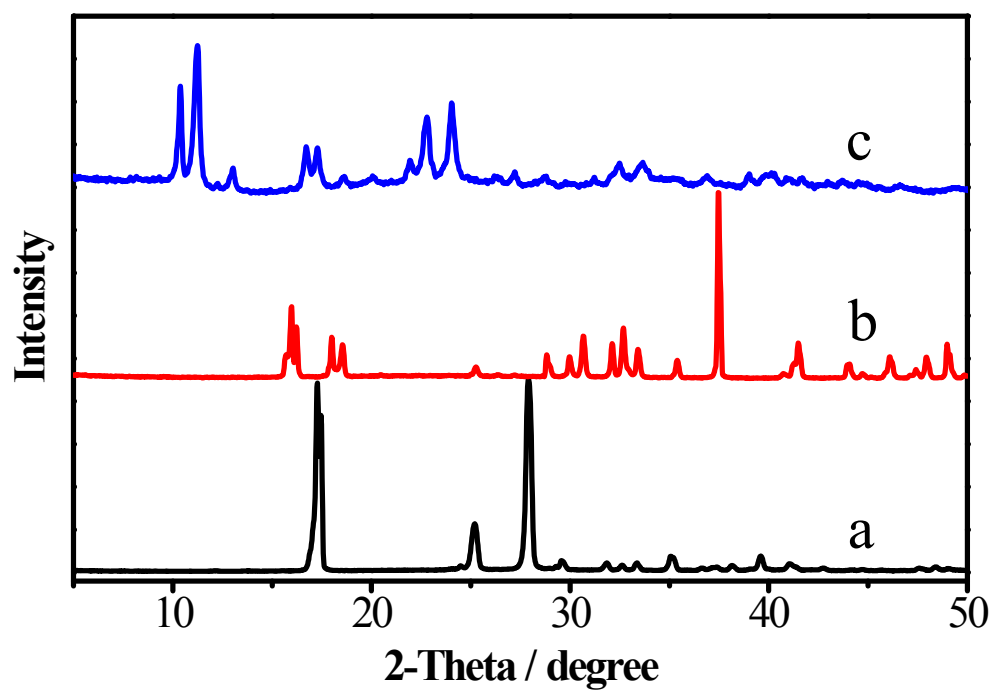

**Figure S2.** XRD patterns of H<sub>2</sub>BDC (a), NiCl<sub>2</sub>·6H<sub>2</sub>O (b) and Ni-BDC (c).

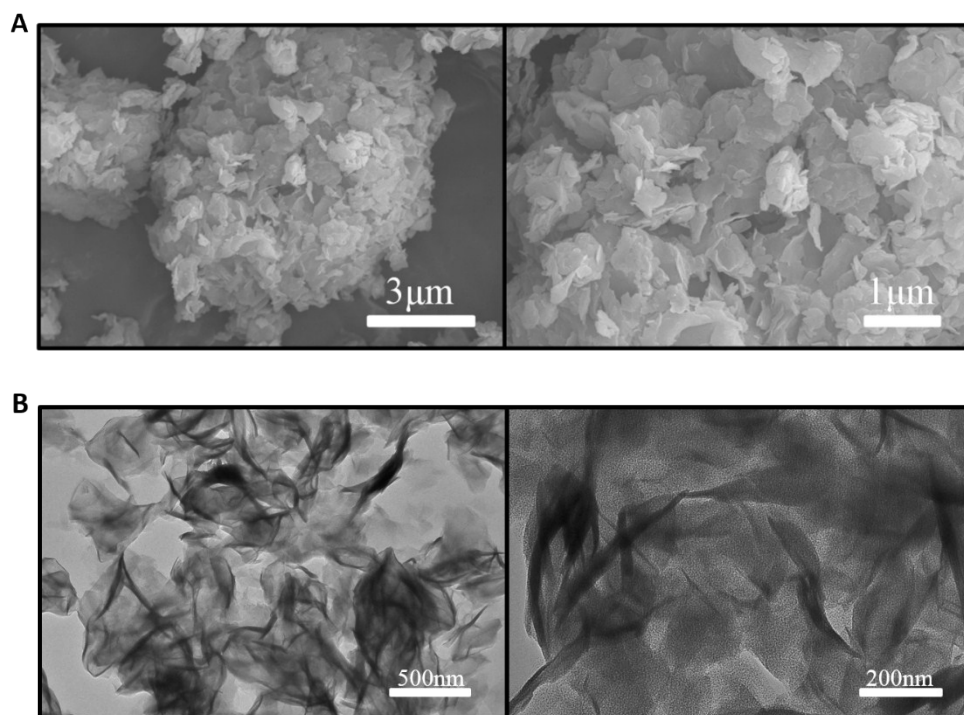

**Figure S3.** A: SEM images of Ni-BDC; B: TEM images of Ni-BDC.

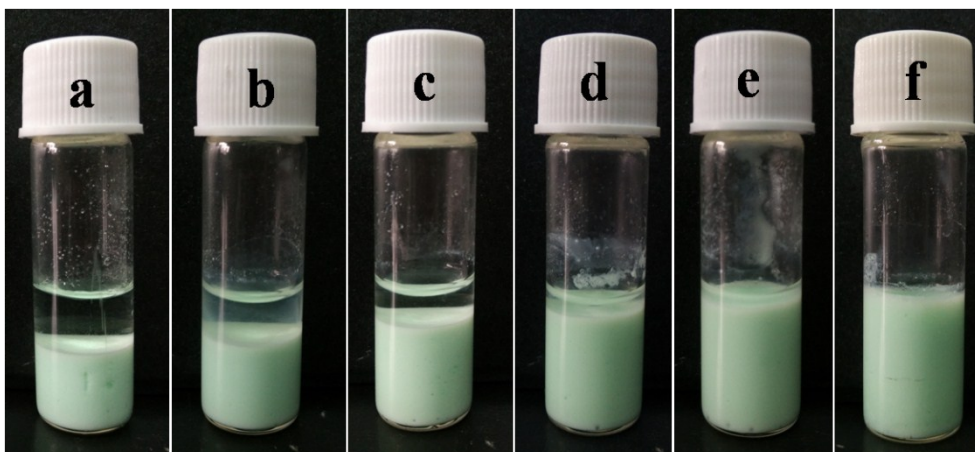

**Figure S4.** Photographs of emulsions stabilized by Ni-BDC with IL volume fractions of 0.1 (a), 0.2 (b), 0.3 (c), 0.4 (d), 0.5 (e) and 0.6 (f) standing for a week after emulsified.

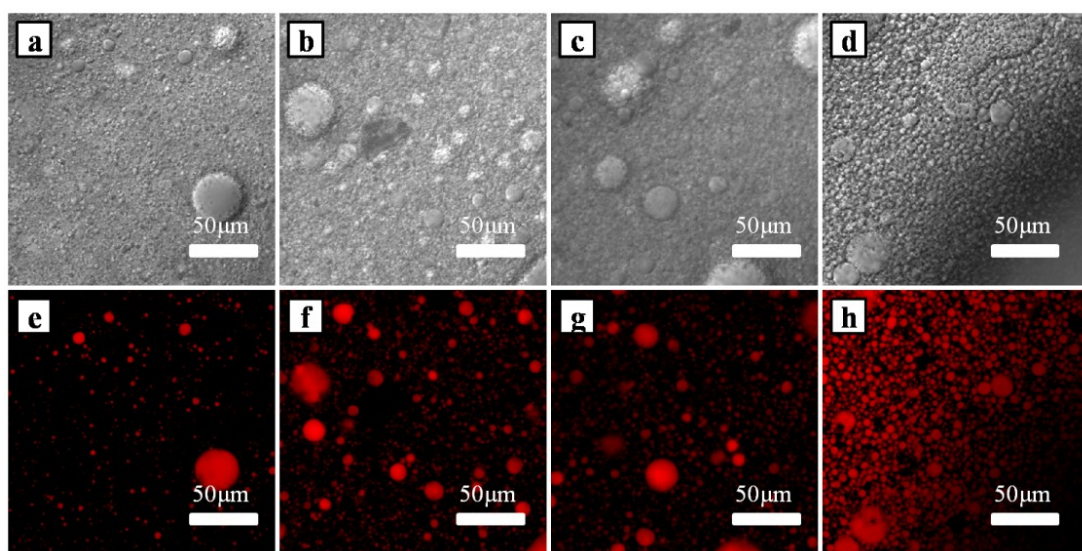

**Figure S5.** CLSM images of the emulsions stabilized by Ni-BDC with IL volume fractions of 0.1 (a, e), 0.2 (b, f), 0.3 (c, g) and 0.4 (d, h).

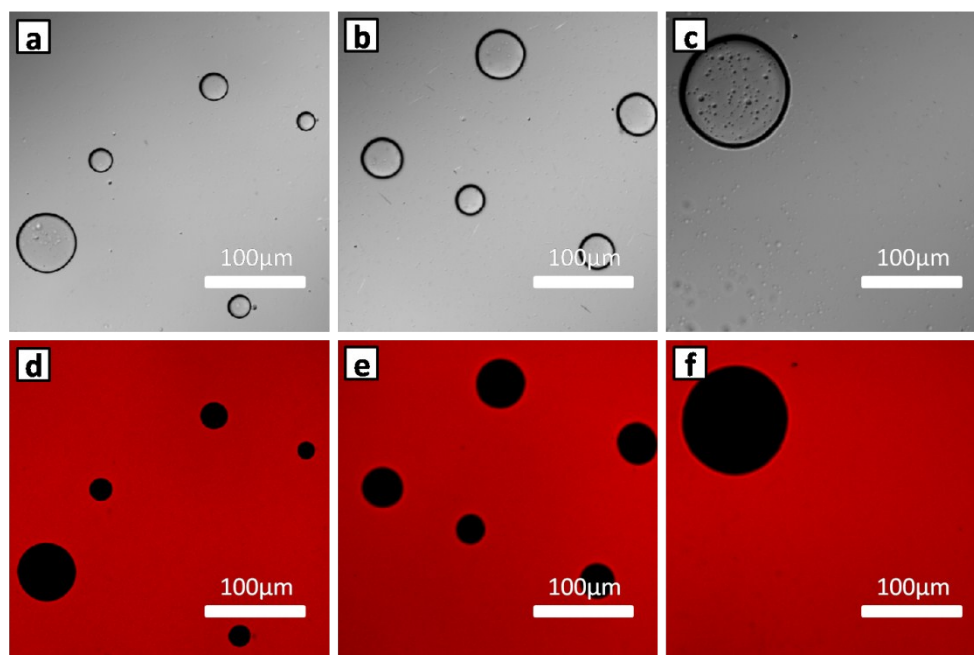

**Figure S6.** CLSM images of the emulsions stabilized by Ni-BDC with IL volume fractions of 0.7 (a, d), 0.8 (b, e), and 0.9 (c, f).

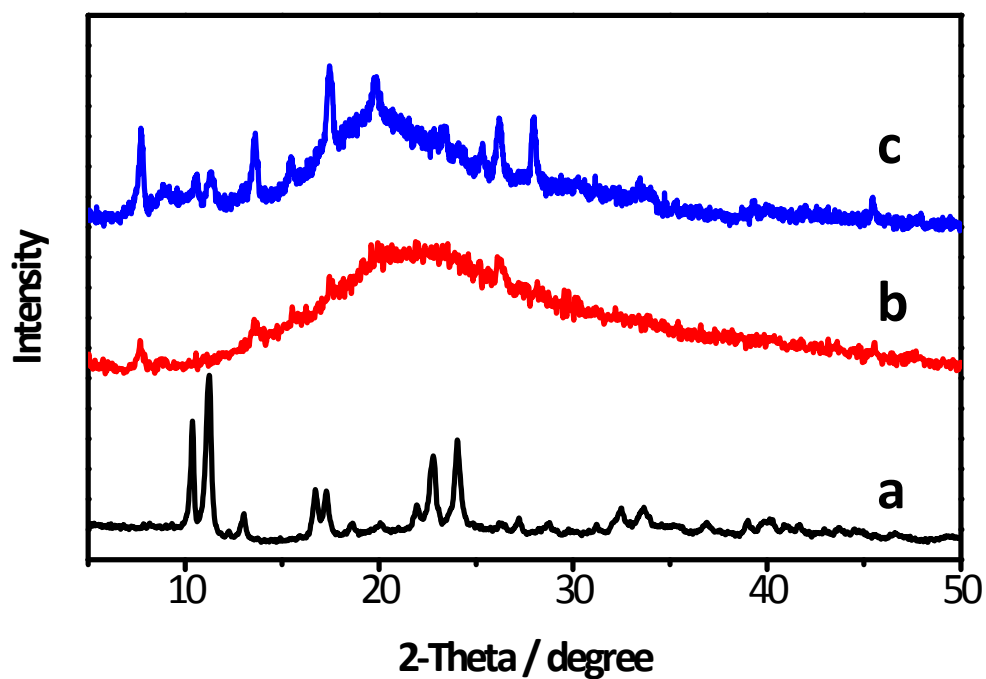

**Figure S7.** XRD patterns of Ni-BDC (a), Ni-BDC@PAM (b) and Ni-BDC@PS (c).

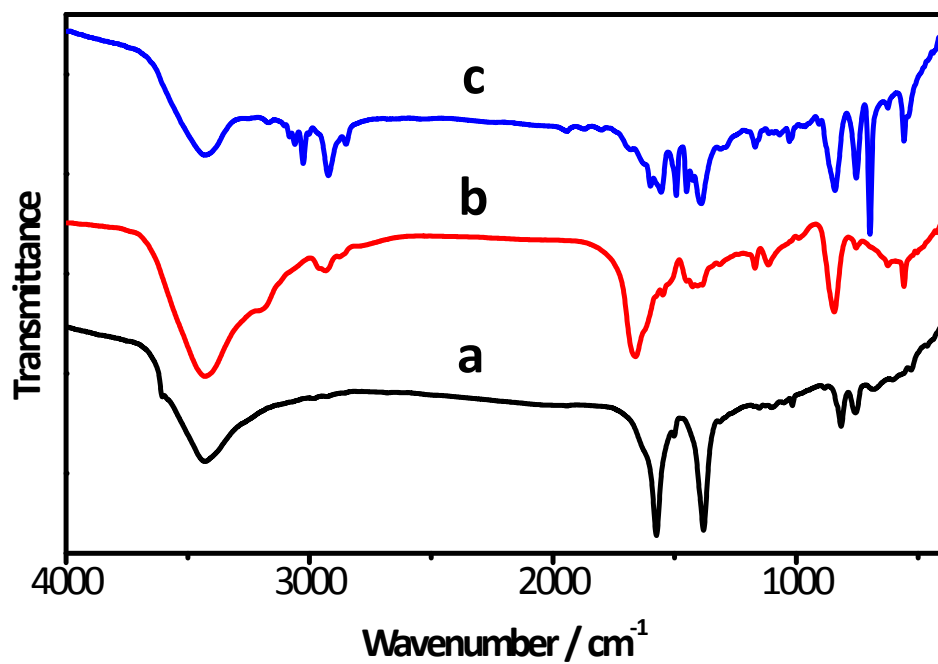

**Figure S8.** FT-IR spectra of Ni-BDC (a), Ni-BDC@PAM (b) and Ni-BDC@PS (c).

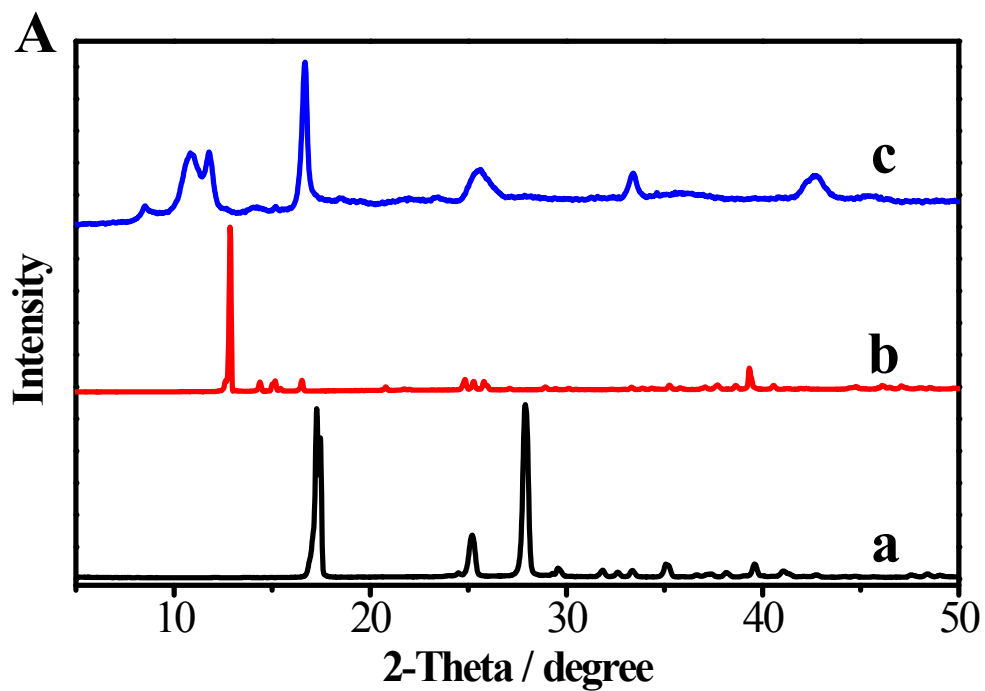

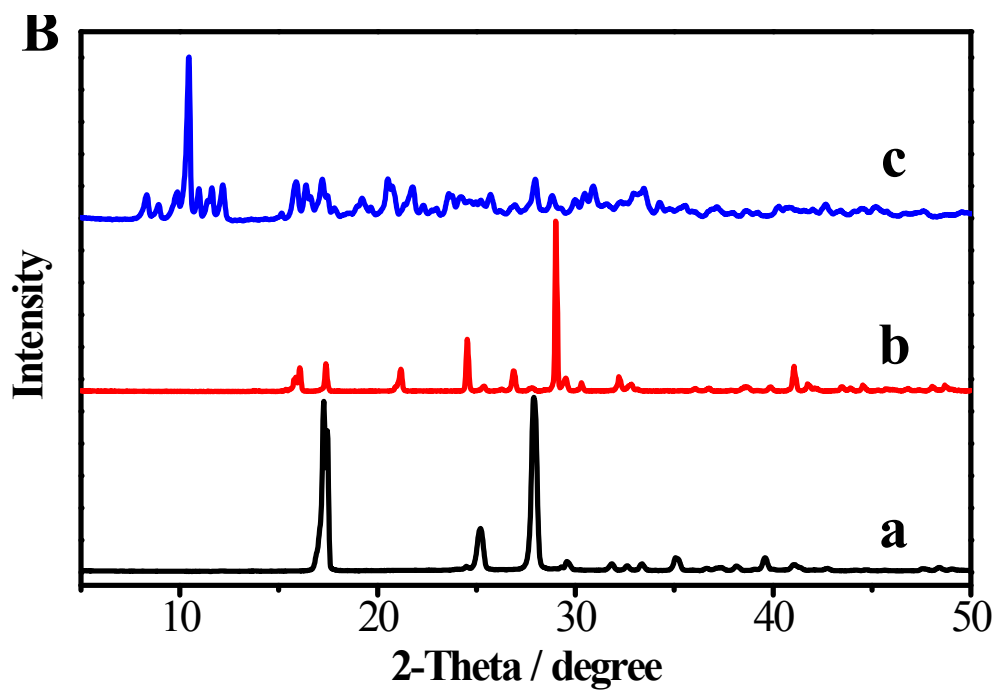

**Figure S9.** (A): XRD patterns of H<sub>2</sub>BDC (a), Cu(OAc)<sub>2</sub>·H<sub>2</sub>O (b) and Cu-BDC (c); (B): XRD patterns of H<sub>2</sub>BDC (a), Zn(NO<sub>3</sub>)<sub>2</sub>·6H<sub>2</sub>O (b) and Zn-BDC (c).

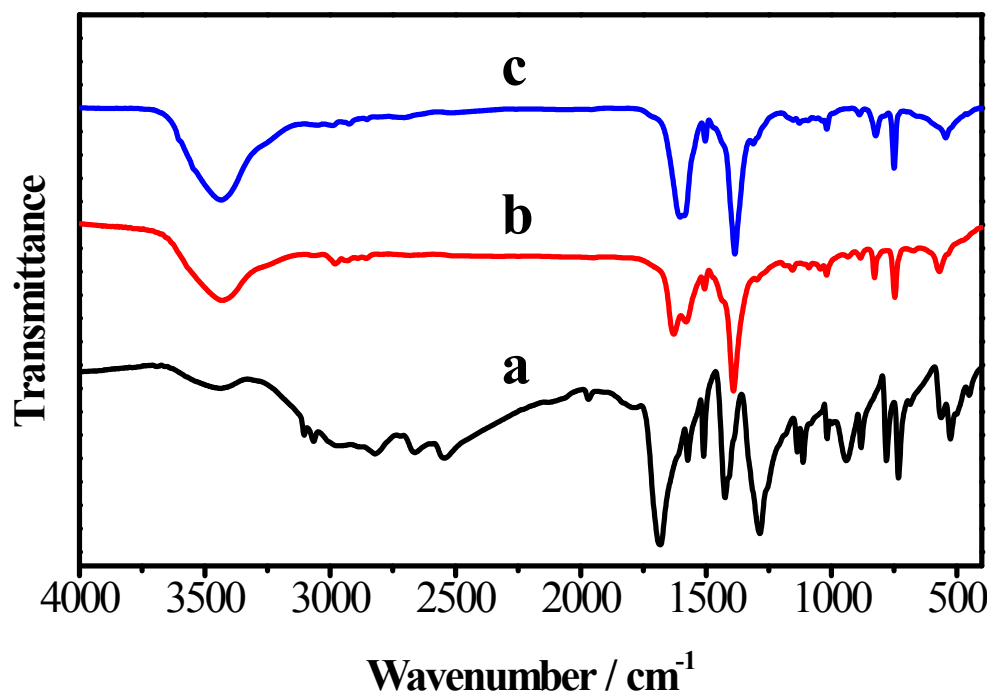

**Figure S10.** FT-IR spectra of H<sub>2</sub>BDC (a), Cu-BDC (b) and Zn-BDC (c).

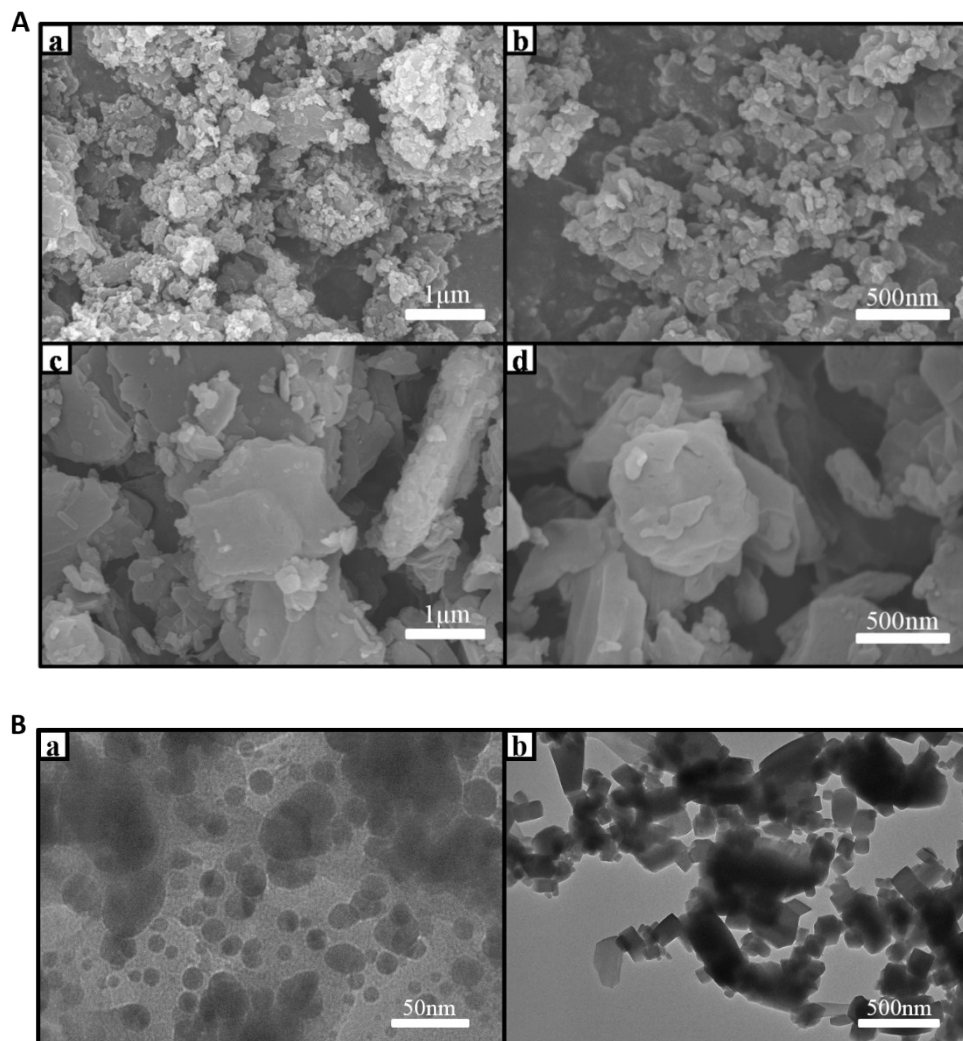

**Figure S11.** A: SEM images of Cu-BDC (a, b) and Zn-BDC (c, d); B: TEM images of Cu-BDC (a) and Zn-BDC (b).

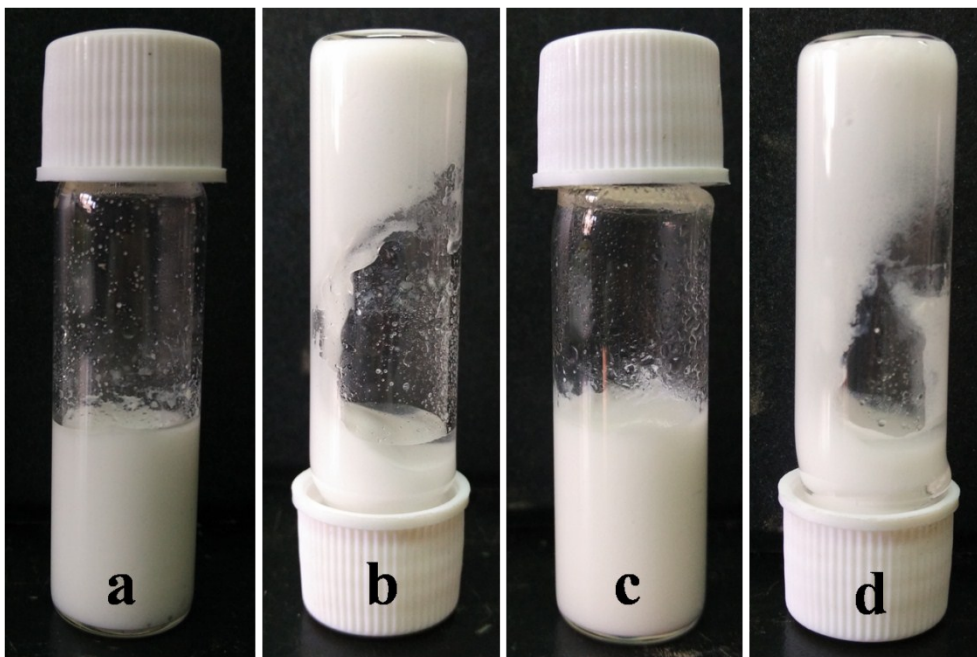

**Figure S12.** Photographs of emulsions stabilized by Zn-BDC with IL volume fractions of 0.5 (a, b) and 0.6 (c, d).

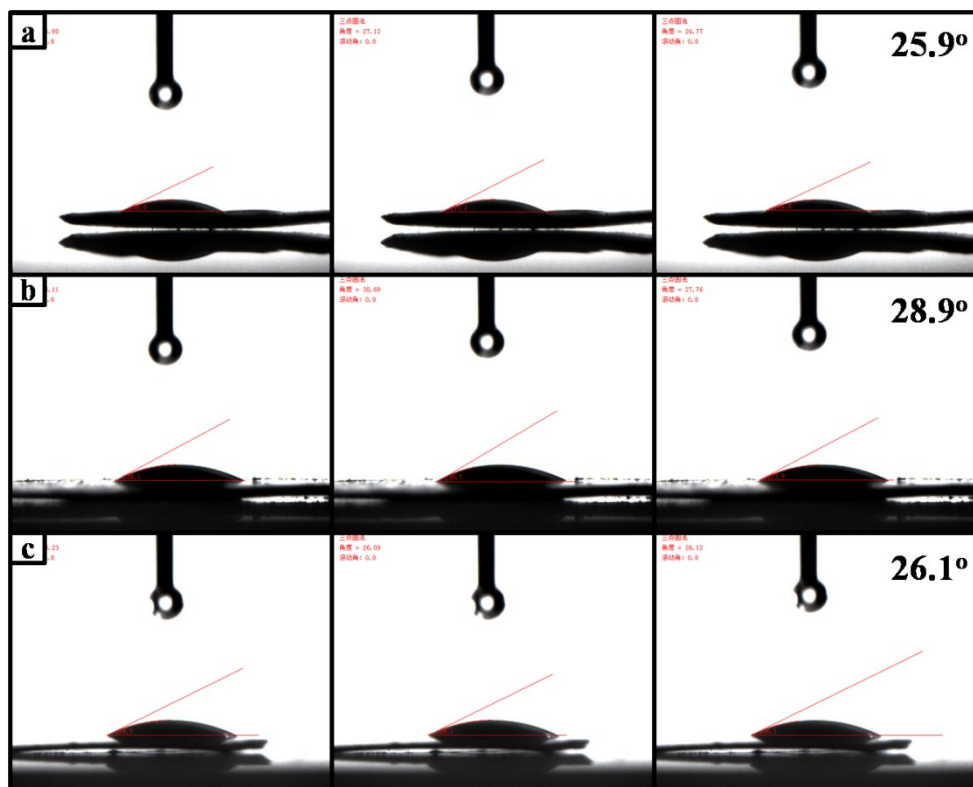

**Figure S13.** Photographs of contact angle of Ni-BDC (a), Cu-BDC (b) and Zn-BDC (c).
